# Supplementary material for: Students’ Willingness to Plant Trees and Pay for Their Maintenance on Campuses in the Democratic Republic of Congo
Source: MDPI journal article supplement (doi:10.3390/su142215148), 2022-11-15
Supplement: s1 [file s1]

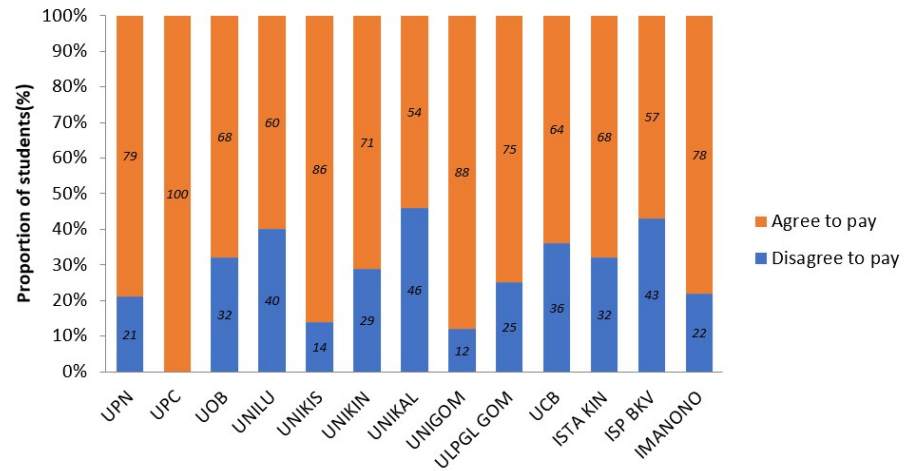

**Figure S1.** Distribution of students within universities according to their WTP for tree maintenance.

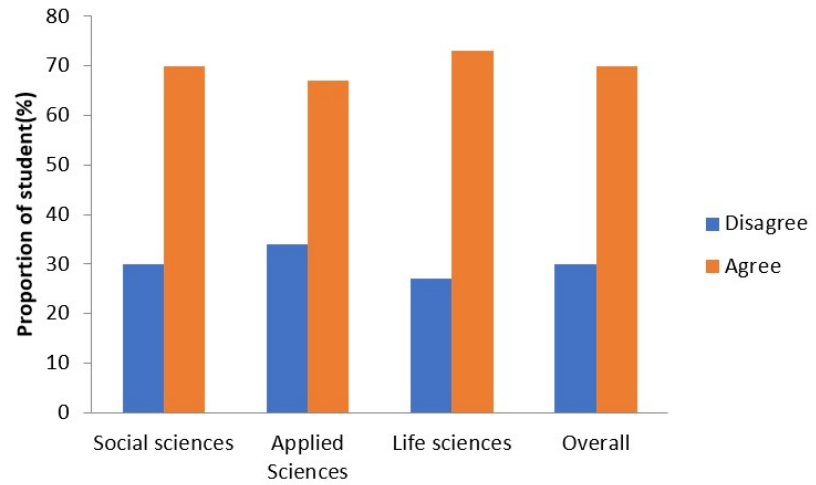

**Figure S2.** Distribution of students within faculties according to their WTP for tree maintenance.

**Table S1.** Amount that students agreed to pay per year by university and faculty.

| Parameters   | Modalities       | Amount to Pay    |                |                |                  | Stat. Test |          |
|--------------|------------------|------------------|----------------|----------------|------------------|------------|----------|
|              |                  | ≤ USD 5          | USD 6–10       | > USD 10       | No pay           | $\chi^2$   | $\alpha$ |
|              | <b>Overall</b>   | <b>518(48.8)</b> | <b>93(8.8)</b> | <b>67(6.3)</b> | <b>384(36.2)</b> |            |          |
| Universities | IMANO            | 28(34.6)         | 27(33.3)       | 7(8.6)         | 19(23.5)         |            |          |
|              | ISPBkv           | 32(38.1)         | 13(15.5)       | (0.0)          | 39(46.4)         |            |          |
|              | ISTA             | 15(60.0)         | (0.00)         | (0.0)          | 10(40.0)         |            |          |
|              | UCB              | 27(33.8)         | 8(10)          | 10(12.5)       | 35(43.8)         |            |          |
|              | ULPGLGom         | 42(43.8)         | 4(4.2)         | 9(9.4)         | 41(42.7)         |            |          |
|              | UNIGom           | 32(43.8)         | 5(6.8)         | 10(13.7)       | 26(35.6)         |            |          |
|              | UNIKAL           | 20(29.4)         | 5(7.4)         | 3(4.4)         | 40(58.8)         | 216.9      | 0.000    |
|              | UNIKIN           | 81(69.8)         | (0.0)          | (0.0)          | 35(30.2)         |            |          |
|              | UNIKIS           | 36(49.3)         | 7(9.6)         | 10(13.7)       | 20(27.4)         |            |          |
|              | UNILU            | 99(43.8)         | 20(8.8)        | 17(7.5)        | 90(39.8)         |            |          |
|              | UOB              | 36(60.0)         | 4(6.7)         | 1(1.7)         | 19(31.7)         |            |          |
|              | UPC              | 33(100.0)        | 0(0.0)         | 0(0.0)         | 0(0.0)           |            |          |
|              | UPN              | 37(78.7)         | 0(0.0)         | 0(0.0)         | 10(21.3)         |            |          |
|              | Life sciences    | 97(42.7)         | 35(15.4)       | 19(8.4)        | 76(33.5)         |            |          |
| Faculties    | Applied sciences | 118(49.4)        | 19(7.9)        | 18(7.5)        | 84(35.1)         | 21.7       | 0.001    |
|              | Social sciences  | 303(50.8)        | 39(6.5)        | 30(5.2)        | 224(37.6)        |            |          |
